# Supplementary material for: Exchange Counterion in Polycationic Hydrogels: Tunability of Hydrophobicity, Water State, and Floating Capability for a Floating pH Device
Source: MDPI journal article supplement (doi:10.3390/gels7030109), 2021-08-05
Supplement: s1 [file s1]

## Supporting information

### Exchange counterion in polycationic hydrogels: tunability of hydrophobicity, water state, and floating capability toward for a floating pH device.

Martin Danko<sup>\*,1,2</sup>, Zuzana Kronekova<sup>2</sup>, Igor Krupa<sup>1</sup>, Jan Tkac<sup>3</sup>, Peter Matúš<sup>4</sup>, and Peter Kasak<sup>\*,1</sup>

<sup>1</sup> Center for Advanced Materials, Qatar University, P.O. Box 2713 Doha, Qatar; igor.krupa@qu.edu.qa (I.K.); peter.kasak@qu.edu.qa (P.K.)

<sup>2</sup> Polymer Institute, Slovak Academy of Sciences, Dúbravská cesta 9, 845 41 Bratislava, Slovak Republic; Martin.danko@savba.sk

<sup>3</sup> Institute of Chemistry, Slovak Academy of Sciences, Dúbravská cesta 9, 845 38 Bratislava, Slovak Republic; jan.tkac@savba.sk

<sup>4</sup> Institute of Laboratory Research on Geomaterials, Faculty of Natural Sciences, Comenius University in Bratislava, Mlynská dolina, Ilkovičova 6, 842 15 Bratislava, Slovak Republic; peter.matus@uniba.sk (P.M.).

\* Correspondence: peter.kasak@qu.edu.qa; Tel.: 00974 44035674, P.K.; martin.danko@savba.sk,; M.D.

Content:

**Figure S1:** ATR-FTIR spectra of G1 and G2 gel series measured as xerogel after drying.

**Figure S2:** Representative photographs of gel samples as prepared, after washing in NaCl and after DS anion exchange.

**Figure S3:** Kinetic of DS anion exchange followed by FTIR at absorption band at 1243 cm<sup>-1</sup>. The spectra were normalized at 1535 cm<sup>-1</sup> absorption band related to polymer backbone.

**Figure S4:** Raman signal of G1-3-Cl and G1-3-PFO gels focused in different layer in the gel sample as that presented in main article Figure 5.

**Figure S5:** Swelling behavior of G1-3 and G2-1 in various alcohols - (a) G1-3-Cl, G2-1-Cl and (b) G1-3-PFO, G2-1-PFO gels. Dashed line represents no weight or dimension change with respect to equilibrated gels in 0.9 wt% NaCl/water solution.

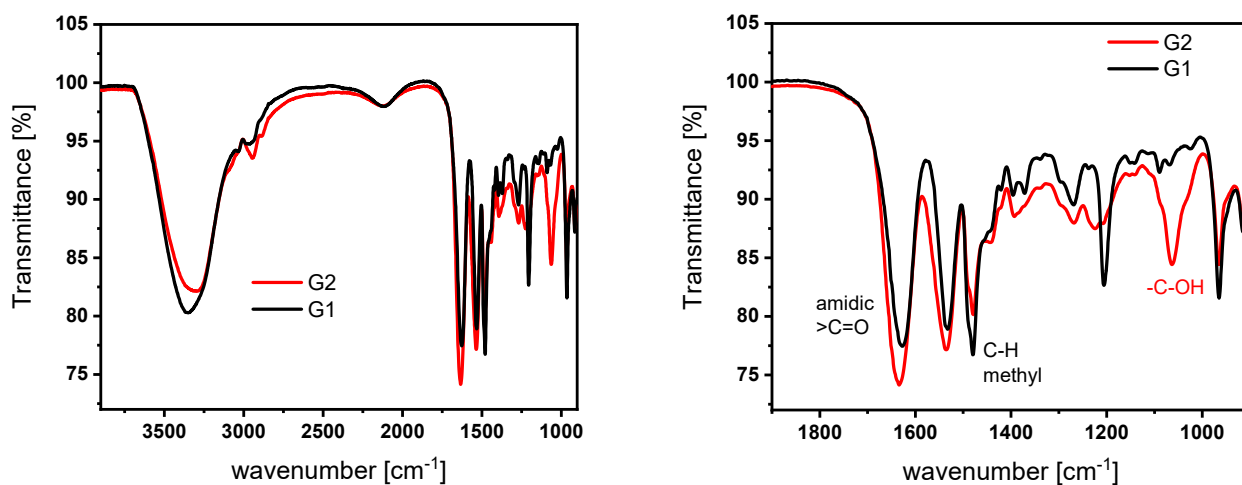

**Figure S1:** ATR-FTIR spectra of G1 and G2 gel series measured as xerogel after drying.

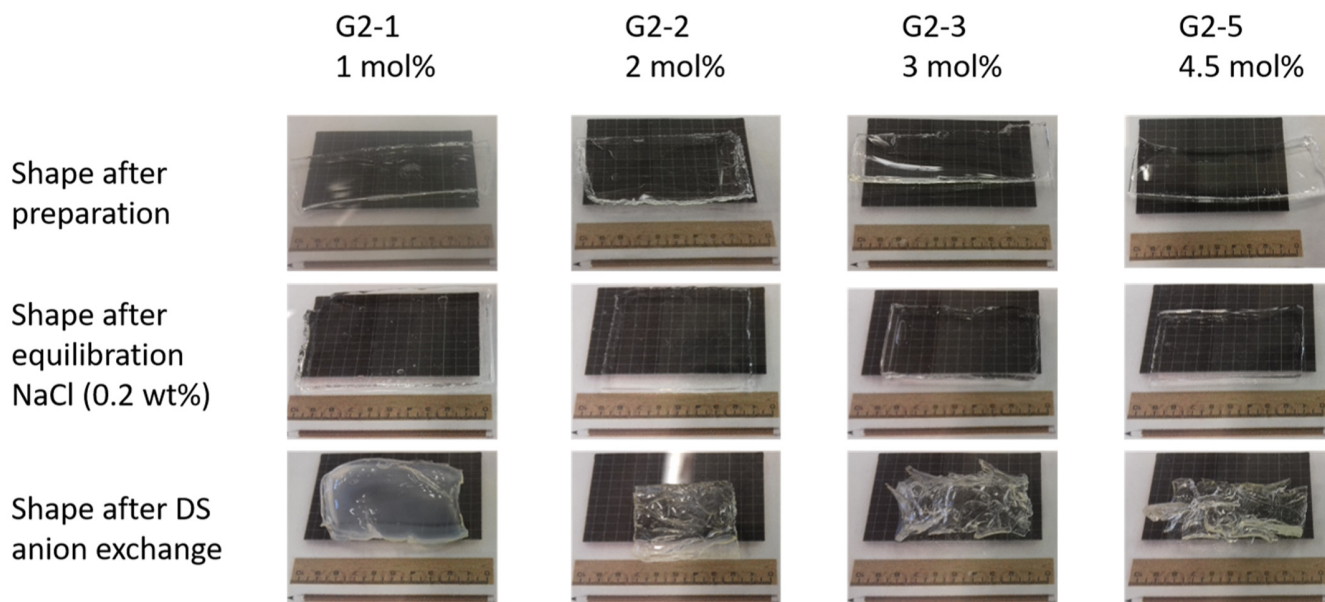

**Figure S2:** Representative photographs of gel samples as prepared, after washing in NaCl and after DS anion exchange.

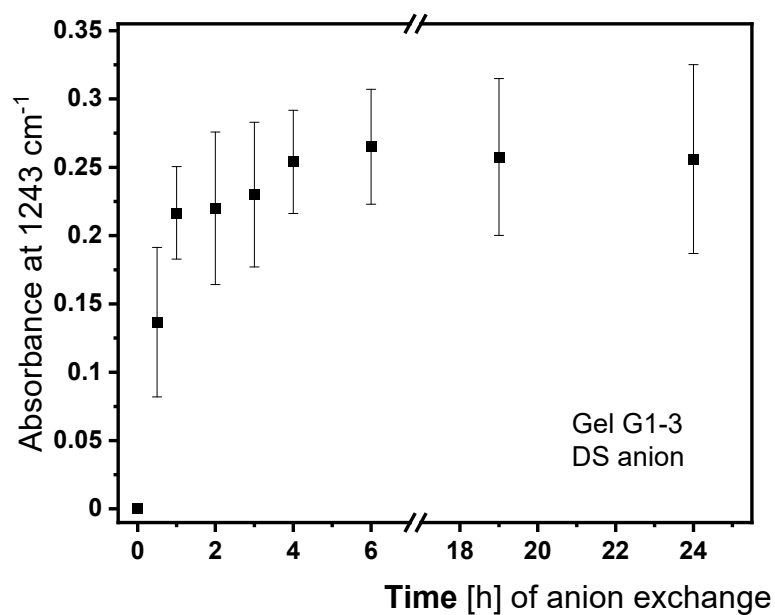

**Figure S3:** Kinetic of DS anion exchange followed by FTIR at absorption band at 1243 cm<sup>-1</sup>. The spectra were normalized at 1535 cm<sup>-1</sup> absorption band related to polymer backbone.

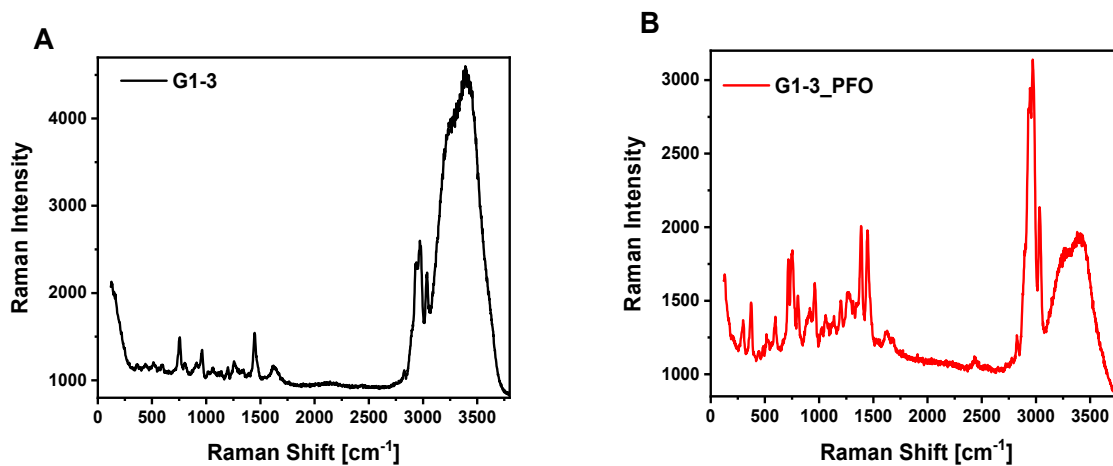

**Figure S4:** Raman signal of G1-3-Cl (A) and G1-3-PFO (B) gels focused in different layer in the gel sample as that presented in main article Figure 5.

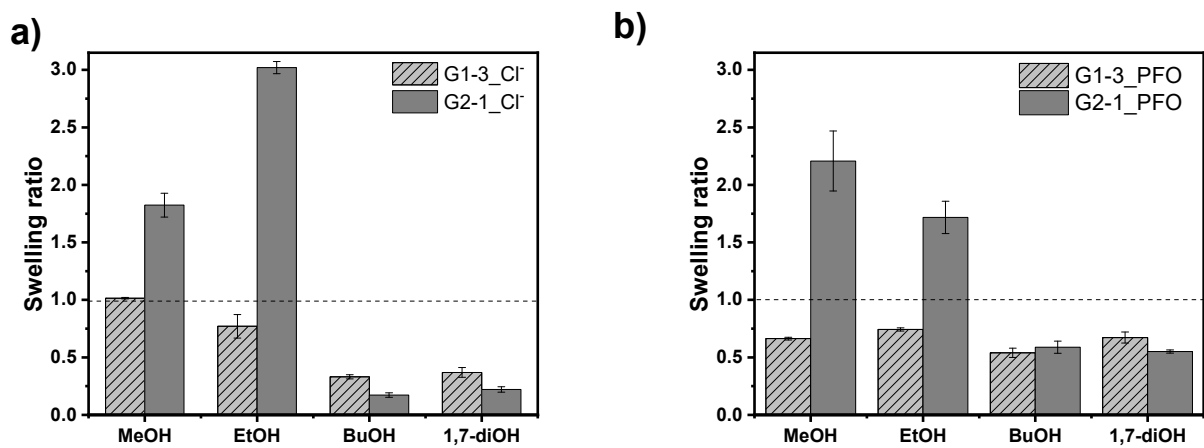

**Figure S5:** Swelling behavior of G1-3 and G2-1 in various alcohols - (a) G1-3-Cl, G2-1-Cl and (b) G1-3-PFO, G2-1-PFO gels. Dashed line represents no weight or dimension change with respect to equilibrated gels in 0.9 wt% NaCl/water solution.

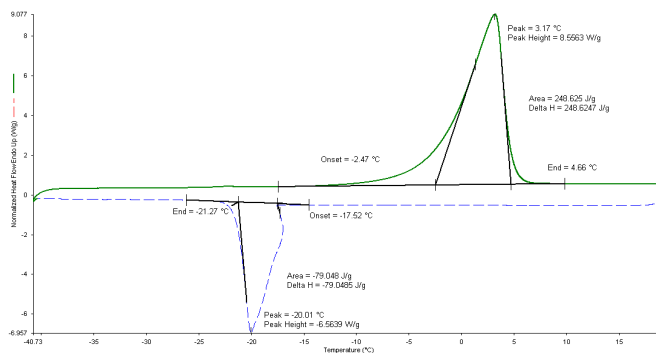

**G1-1-CI**

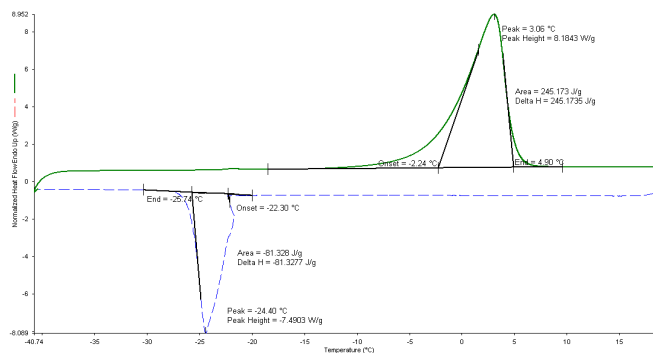

**G1-2-CI**

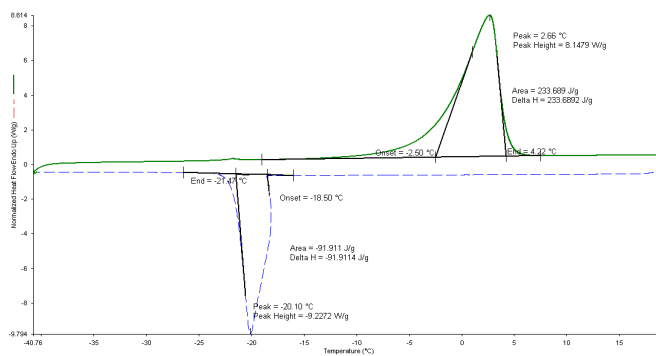

**G1-3-CI**

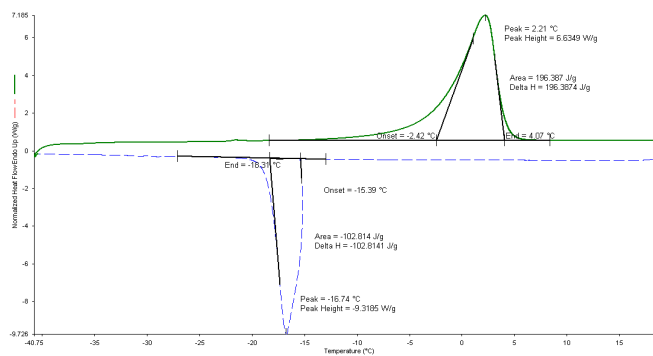

**G1-5-CI**

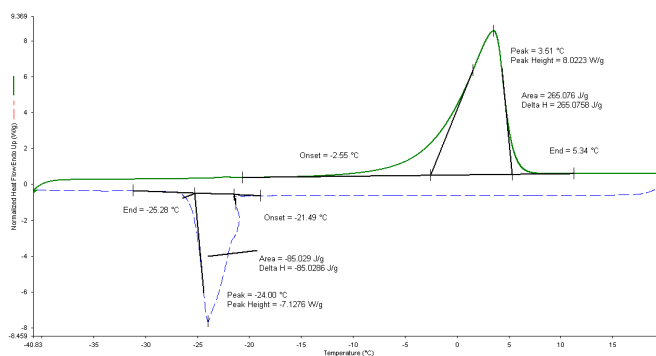

**G2-1-CI**

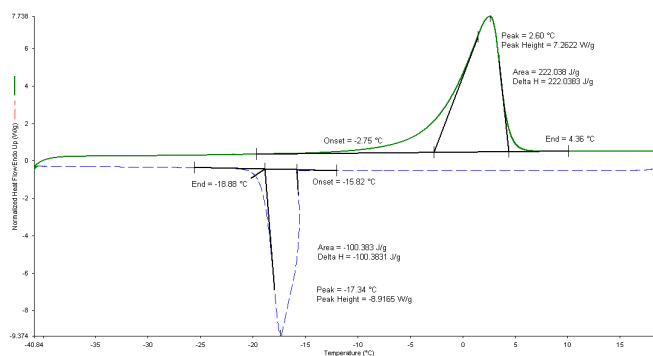

**G2-2-CI**

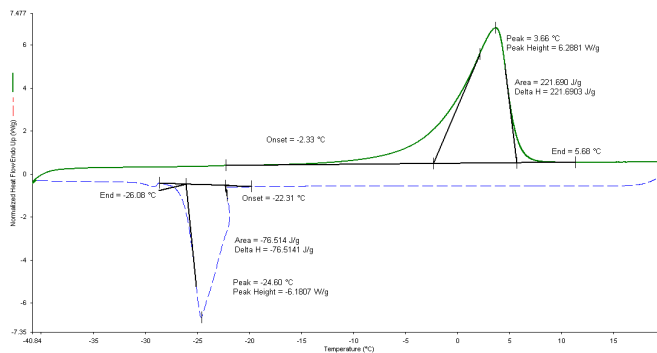

**G2-3-Cl**

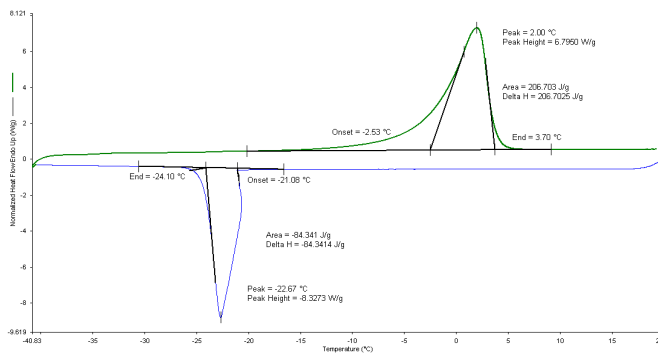

**G2-5-Cl**

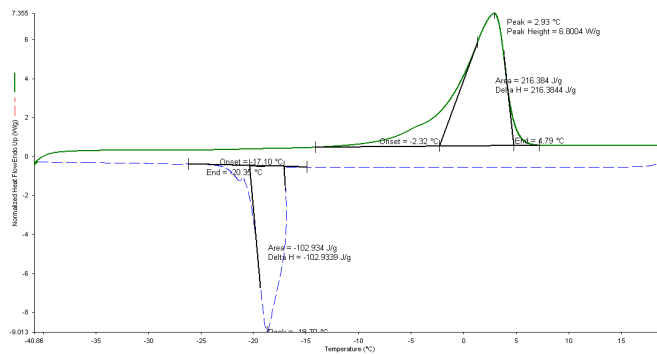

**G1-3-CaS**

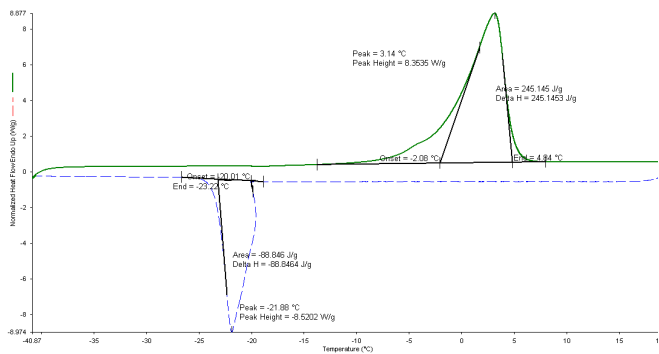

**G2-1-CaS**

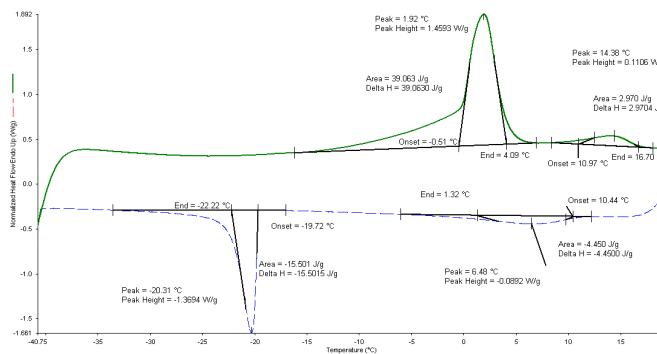

**G1-3-DS**

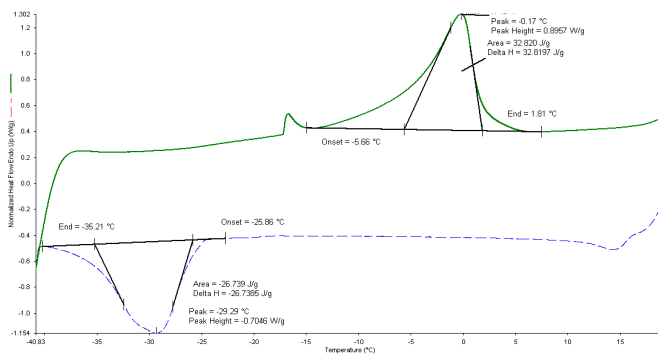

**G2-1-DS**

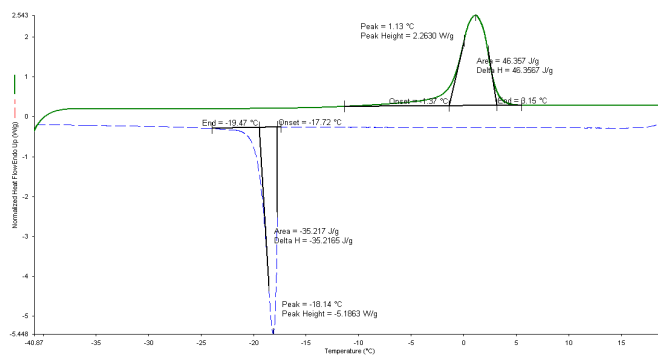

*G1-3-PFO*

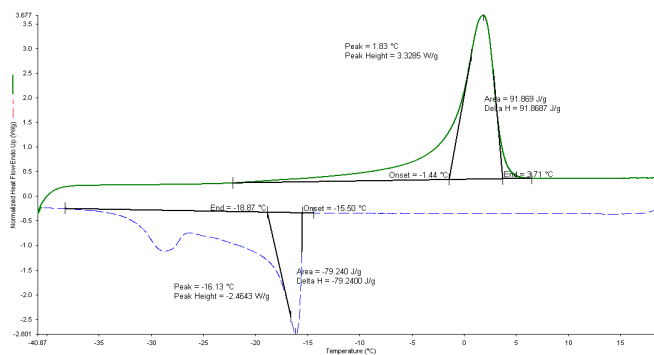

*G2-1-PFO*

**Figure S6: DSC thermograms**
